# Supplementary material
Source: PubMed Central journal article supplement (PMC6755796)
Supplement: supp_RA119.009131_152500_1_supp_364504_p1sqh1.pdf [file supp_RA119.009131_152500_1_supp_364504_p1sqh1.pdf]

## **Supporting Information**

Structural basis of the atypical activation mechanism for KRAS V14I

**Asim K Bera<sup>1</sup>, Jia Lu<sup>1</sup>, Thomas E. Wales<sup>2</sup>, Sudershan Gondi<sup>1</sup>, Deepak Gurbani<sup>1</sup>, Andrew Nelson<sup>1</sup>, John R. Engen<sup>2</sup>,  
and Kenneth D. Westover<sup>1\*</sup>**

<sup>1</sup>Departments of Biochemistry and Radiation Oncology, The University of Texas Southwestern Medical Center at Dallas,  
Dallas, Texas 75390, United States.

<sup>2</sup>Department of Chemistry and Chemical Biology, Northeastern University, Boston, MA 02115, United States.

**Running title:** Structural basis of KRAS V14I activation

\*Correspondence should be addressed to K.D.W. (Kenneth.Westover@UTSouthwestern.edu).

**Table S1.** HDX Data Summary and list of experimental parameters

| <b>Data Set</b>                               | wild-type KRAS                                                              | V14I KRAS                                      | A146T KRAS  |
|-----------------------------------------------|-----------------------------------------------------------------------------|------------------------------------------------|-------------|
| <b>HDX reaction details<sup>a</sup></b>       | Final D <sub>2</sub> O concentration=94.6%, pH <sub>read</sub> =7.6, 21 °C. |                                                |             |
| <b>HDX time course</b>                        | 0.083, 0.167, 1, 5, 10, 60, and 240 minutes                                 |                                                |             |
| <b>HDX controls</b>                           | 6 undeuterated controls, three for each state                               |                                                |             |
| <b>Back-exchange</b>                          | 30-35%                                                                      |                                                |             |
| <b>Number of peptides<sup>b</sup></b>         | 64 followed                                                                 | 67 followed<br>56 coincident peptides followed | 58 followed |
| <b>Sequence coverage</b>                      | 92.3%                                                                       | 92.9%<br>77.5% coincident coverage             | 92.3%       |
| <b>Average peptide length;<br/>Redundancy</b> | 11.4;4.6                                                                    |                                                |             |
| <b>Replicates</b>                             | 4 technical                                                                 | 2 technical                                    | 2 technical |
| <b>Repeatability</b>                          | +/- 0.30 relative Da                                                        |                                                |             |
| <b>Significant differences</b>                | > 0.8 Da                                                                    |                                                |             |

<sup>a</sup> 18-fold dilution with labeling buffer [10mM Hepes, 150mM NaCl, 5mM MgCl<sub>2</sub> and 5  $\mu$ M GDP, 99.9% D<sub>2</sub>O (pD 8.0)]. 1-fold dilution with quench buffer [300 mM Sodium phosphate pH 2.47, H<sub>2</sub>O].

<sup>b</sup> Parameters to filter peptides for identification from the 6 undeuterated controls were: 2 consecutive products, 0.25 products per amino acid.

**Figure S1:** Side chain residues involved in interaction with GDP in (A) KRAS<sup>WT</sup> and (B) KRAS<sup>V14I</sup>. Figures are generated from crystal structures by using Maestro.

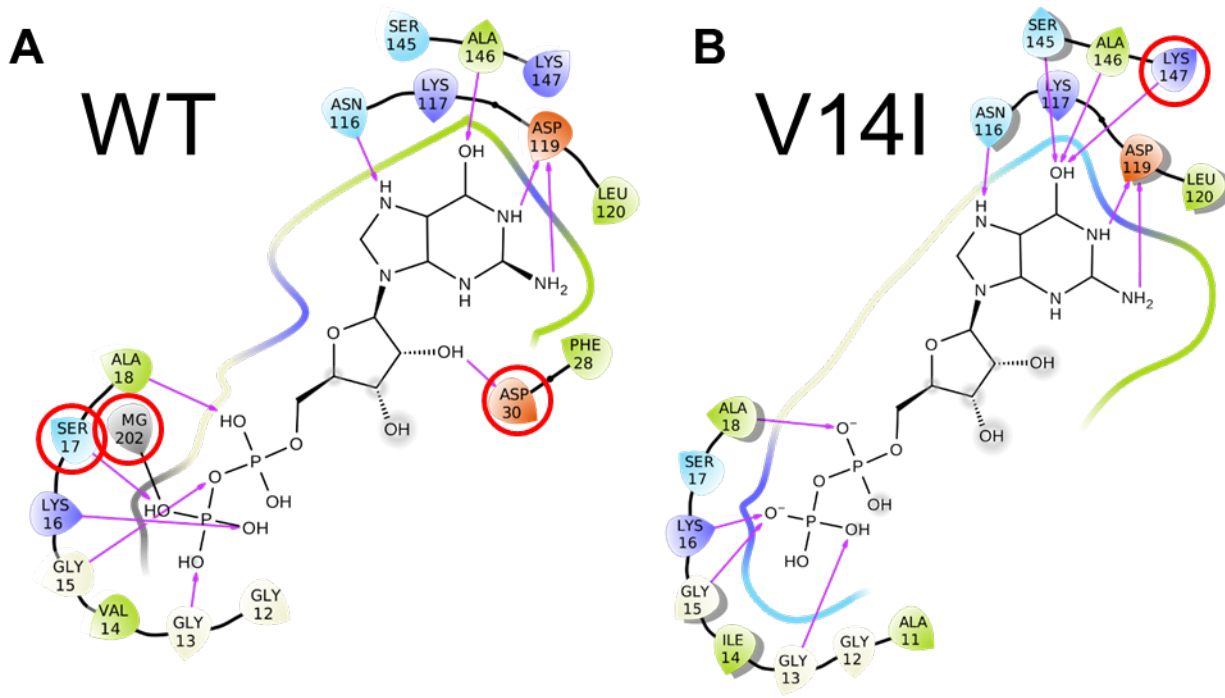

**Figure S2: Deuterium incorporation plots for all peptides followed in the HDX experiments**

### Mutation containing peptides

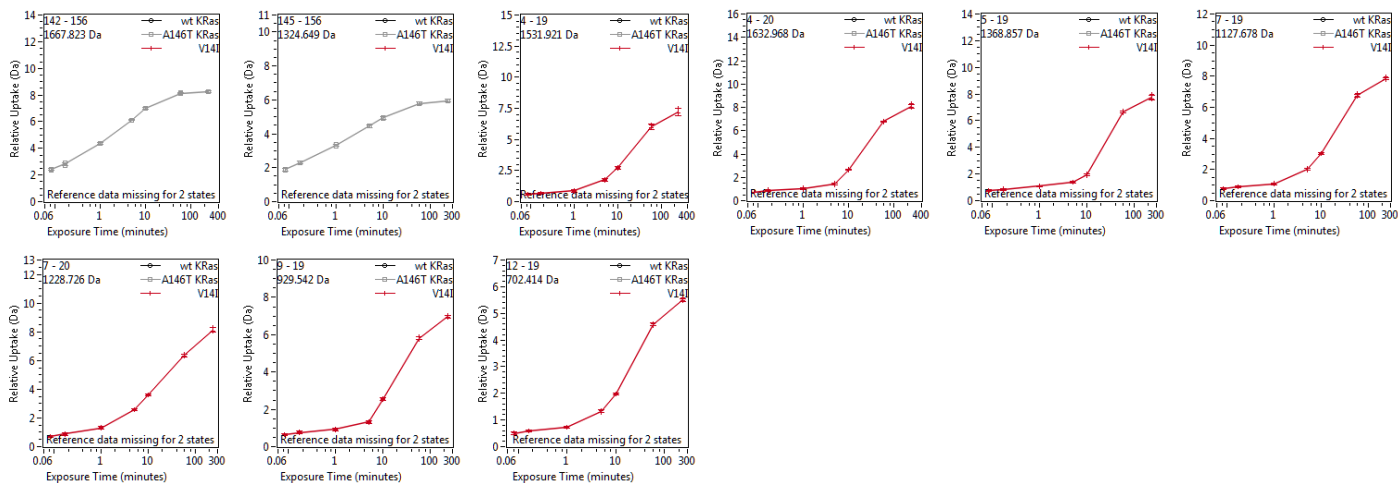

### Coincident peptides

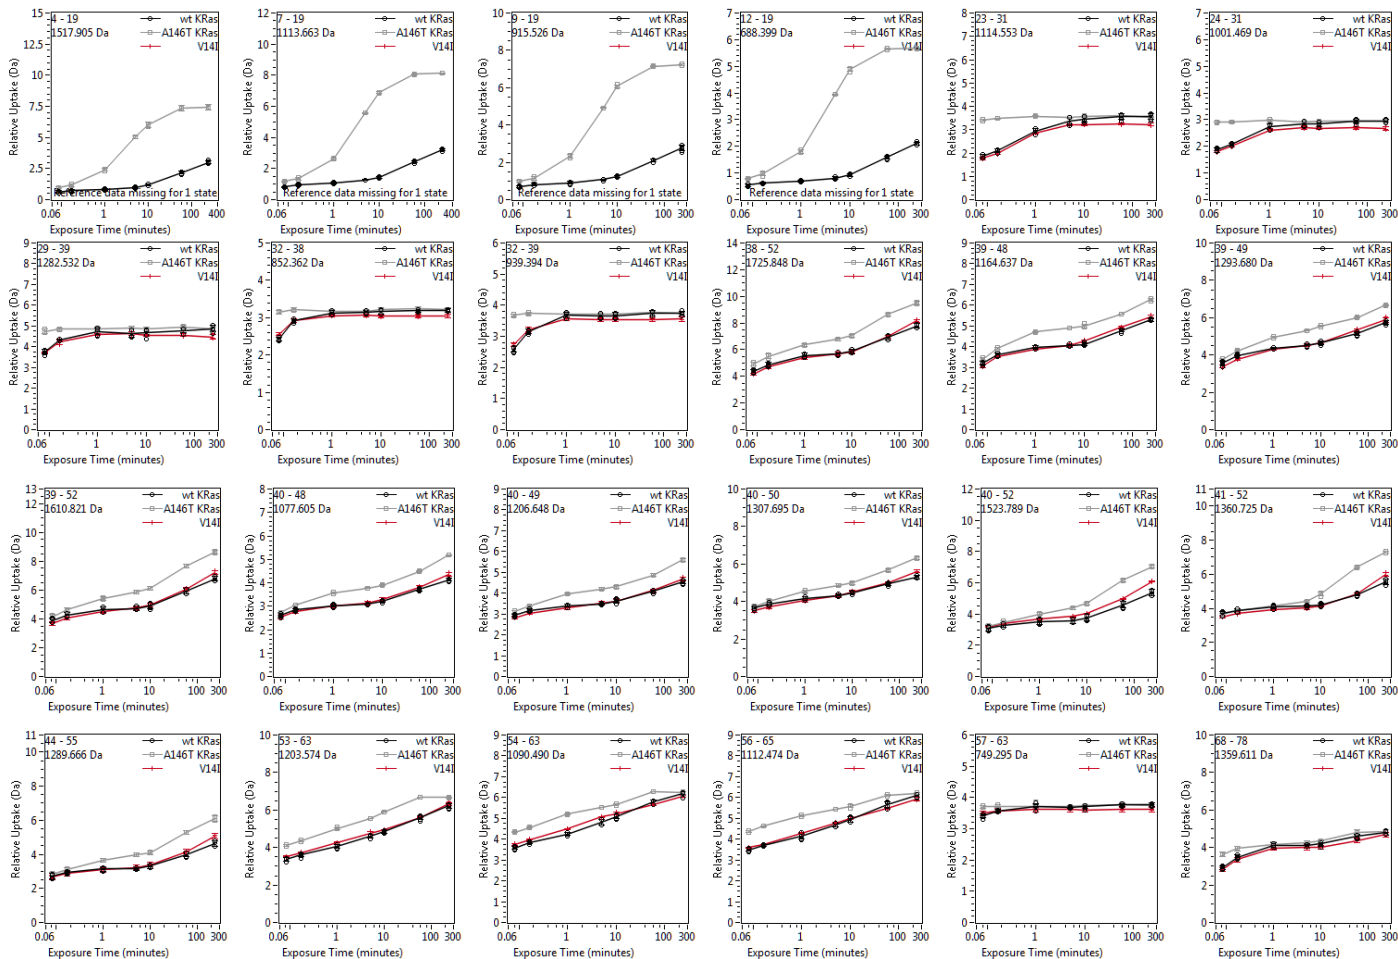

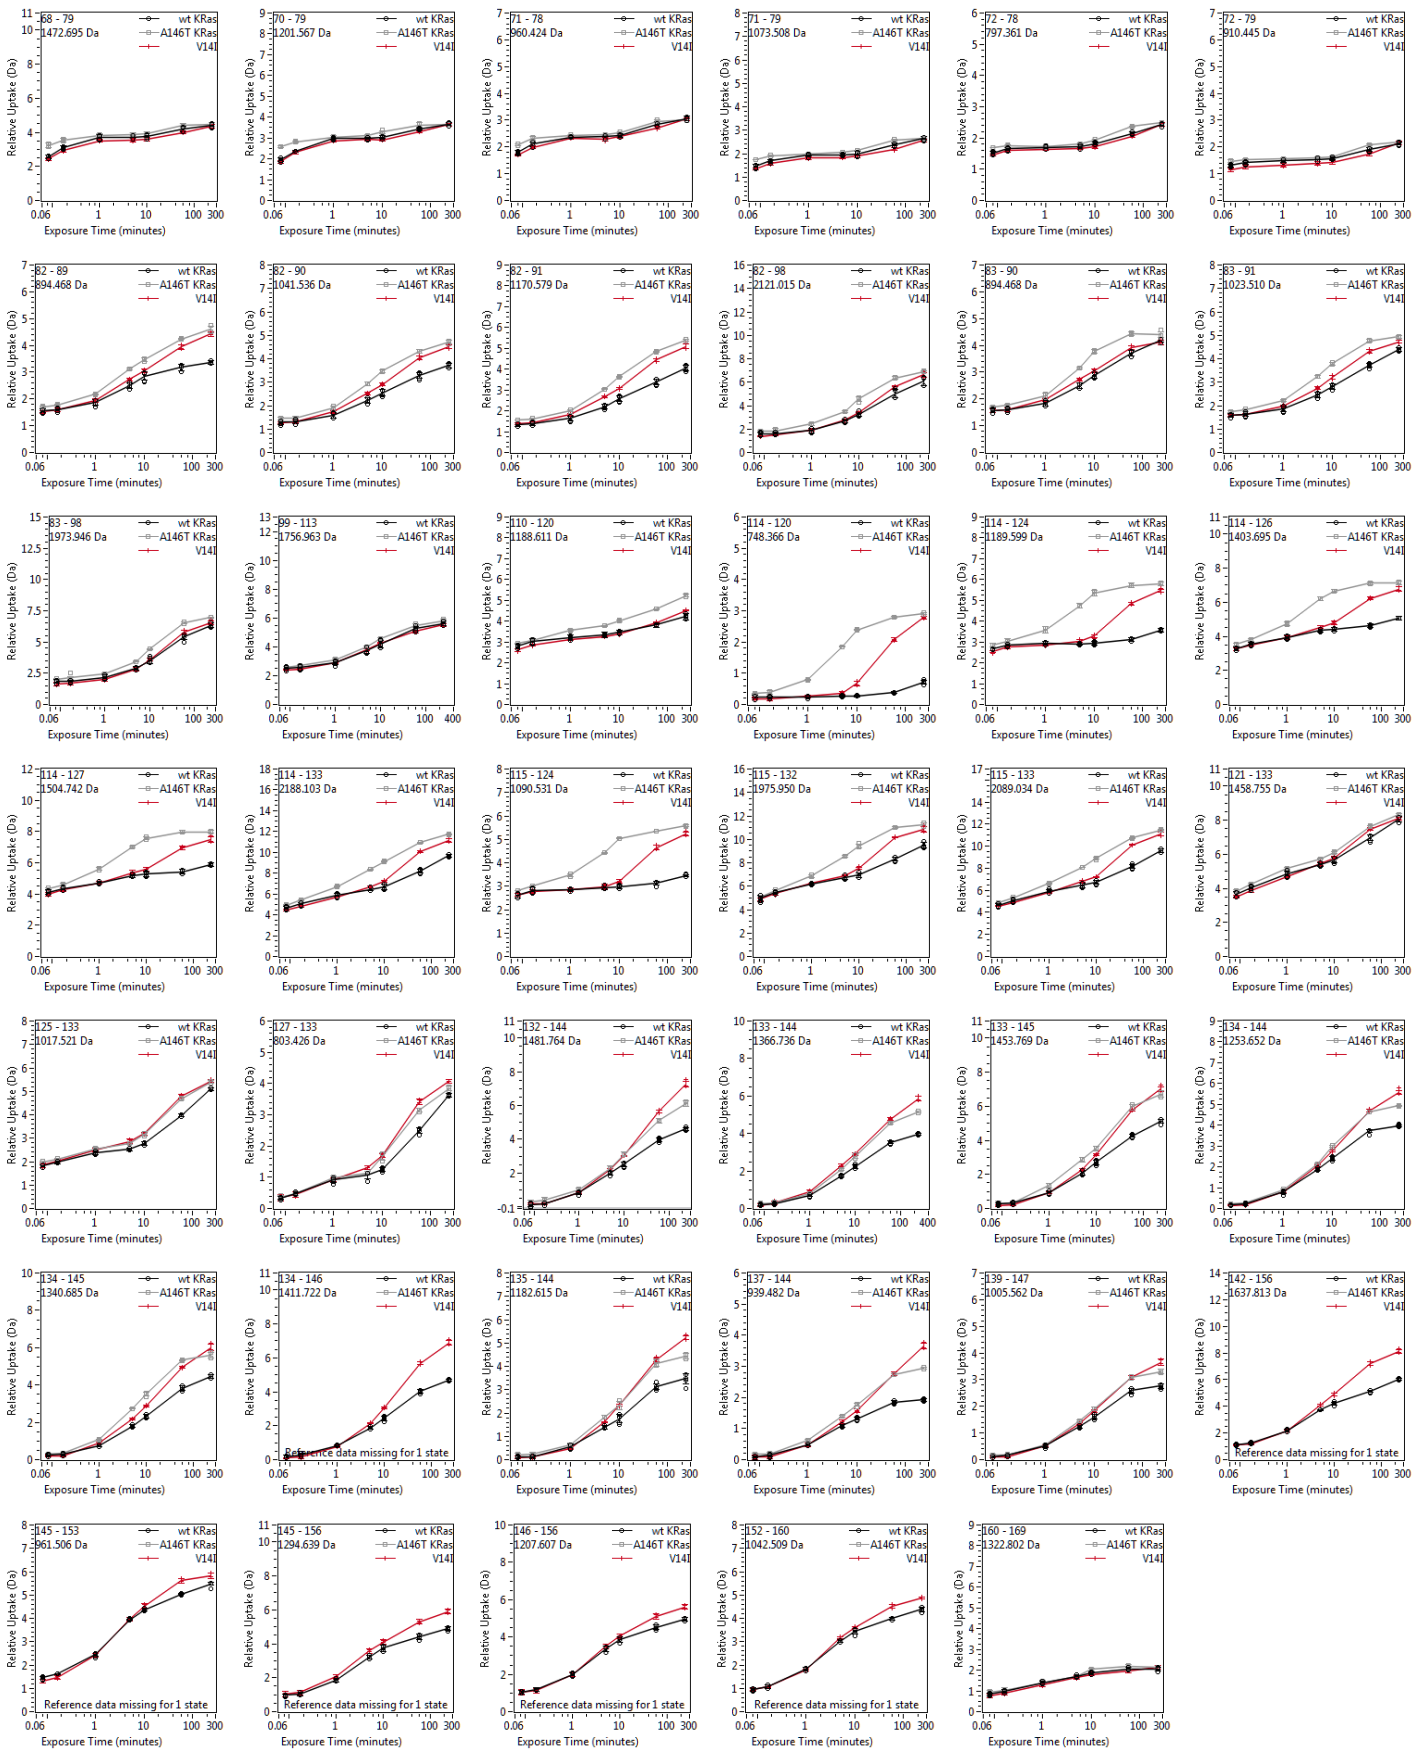

**Figure S3:** Illustrating the relative differences in hydrogen-deuterium exchange mass spectrometry of KRAS<sup>V14I</sup> and KRAS<sup>A146T</sup>.

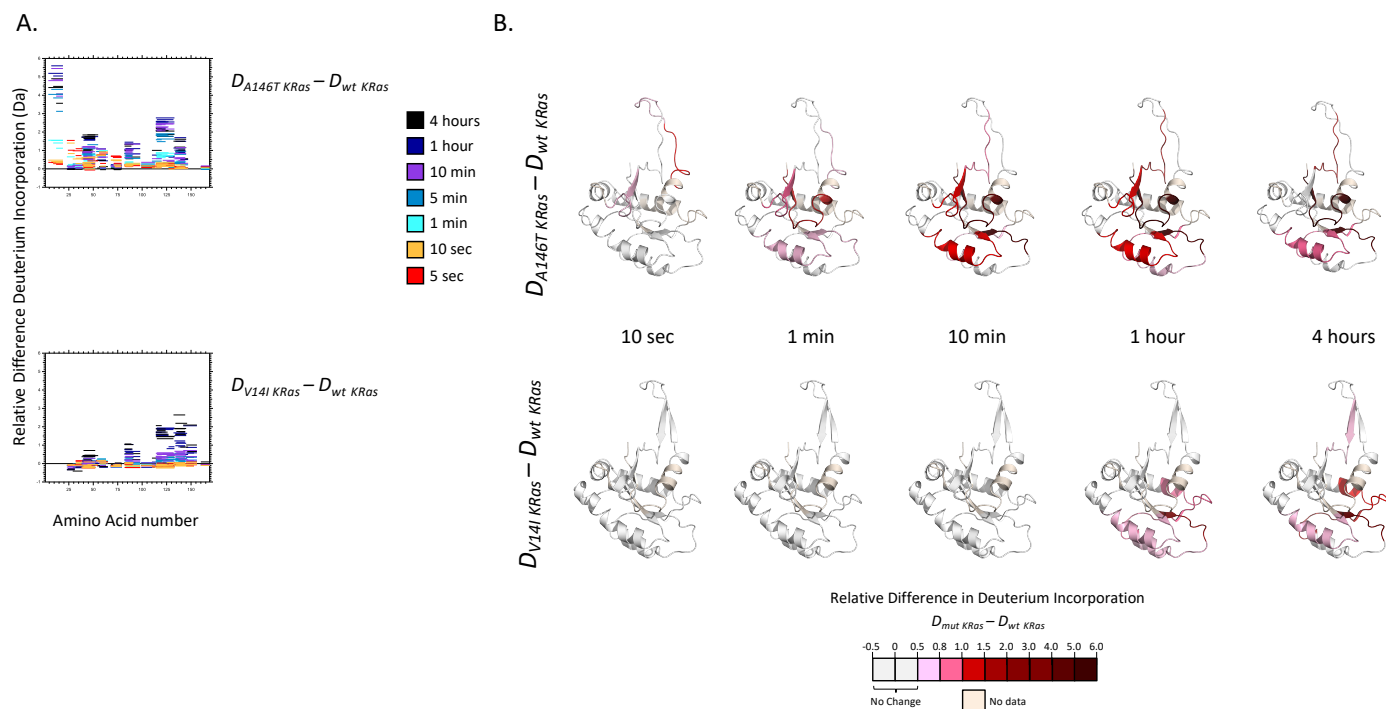

Illustrating the relative differences in hydrogen-deuterium exchange mass spectrometry of KRAS4B<sup>V14I</sup> and KRAS<sup>A146T</sup>. **(A)** Relative differences in deuterium incorporation shown in all peptides coincident between KRAS4B<sup>A146T</sup> vs KRAS<sup>WT</sup> (top panel) and KRAS4B<sup>V14I</sup> vs KRAS<sup>WT</sup> (bottom panel). The relative difference (y-axis) for each peptide is shown for each time point (time points are colored according to scale at the right). The peptides in the regions of mutation are not shown as a subtraction cannot be made against the wildtype (see uptake graphs in Figure S4 for comparison of deuterium levels in the peptides). **(B)** The differences in deuterium incorporation between the mutant and wild-type KRAS constructs at 5 time points are identified on the cartoon structures of KRAS<sup>A146T</sup> (top panel) and KRAS4B<sup>V14I</sup> (bottom panel). Relative differences are calculated as mutant minus wt KRAS and are colored according to the color scale at the bottom.
